1 **Disentangling object category representations driven by dynamic and static**  
2 **visual input**

3  
4 **Abbreviated Title:** Representation of dynamic and static object information

5  
6 Sophia Robert<sup>1,2</sup>, Leslie G. Ungerleider<sup>1</sup>, & Maryam Vaziri-Pashkam<sup>1</sup>

7 <sup>1</sup> Lab of Brain and Cognition, National Institute of Mental Health, Bethesda, MD, USA

8 <sup>2</sup> Department of Psychology and Neuroscience Institute, Carnegie Mellon University, Pittsburgh, PA,  
9 USA

10 Corresponding authors: Sophia Robert [srobert@andrew.cmu.edu](mailto:srobert@andrew.cmu.edu) and Maryam Vaziri-Pashkam  
11 [maryam.vaziri-pashkam@nih.gov](mailto:maryam.vaziri-pashkam@nih.gov)

12  
13 **Number of Pages:** 41

14 **Number of Figures:** 8

15 **Number of Words in Abstract:** 243

16 **Number of Words in Significant Statement:** 120

17 **Number of Words in Introduction:** 635

18 **Number of Words in Discussion:** 1494

19  
20 **Conflict of interest statement:** The authors declare no competing financial interests.

21  
22 **Acknowledgments:** We thank the late and great Leslie G. Ungerleider for her mentorship and guidance  
23 throughout this project, Chris Baker for insightful feedback, and Julian De Freitas for inspiring discussions  
24 that helped in forming the initial interest in this research area. This research was supported by the National  
25 Institute of Mental Health Intramural Research Program (ZIA-MH-002909).

26

## 27 Abstract

28 Humans can label and categorize objects in a visual scene with high accuracy and speed—a  
29 capacity well-characterized with neuroimaging studies using static images. However, motion is  
30 another cue that could be used by the visual system to classify objects. To determine how motion-  
31 defined object category information is processed in the brain, we created a novel stimulus set to  
32 isolate motion-defined signals from other sources of information. We extracted movement  
33 information from videos of 6 object categories and applied the motion to random dot patterns.  
34 Using these stimuli, we investigated whether fMRI responses elicited by motion cues could be  
35 decoded at the object category level in functionally defined regions of occipitotemporal and  
36 parietal cortex. Participants performed a one-back repetition detection task as they viewed motion-  
37 defined stimuli or static images from the original videos. Linear classifiers could decode object  
38 category for both stimulus formats in all higher order regions of interest. More posterior  
39 occipitotemporal and ventral regions showed higher accuracy in the static condition and more  
40 anterior occipitotemporal and dorsal regions showed higher accuracy in the dynamic condition.  
41 Significantly above chance classification accuracies were also observed in all regions when  
42 training and testing the SVM classifier across stimulus formats. These results demonstrate that  
43 motion-defined cues can elicit widespread robust category responses on par with those elicited by  
44 luminance cues in regions of object-selective visual cortex. The informational content of these  
45 responses overlapped with, but also demonstrated interesting distinctions from, those elicited by  
46 static cues.

## 47 Significance Statement

48 Much research on visual object recognition has focused on recognizing objects in static images.

49 However, motion cues are a rich source of information that humans might also use to categorize

50 objects. Here, we present the first study to compare neural representations of several animate and

51 inanimate objects when category information is presented in two formats: static cues or isolated

52 dynamic cues. Our study shows that while higher order brain regions differentially process object

53 categories depending on format, they also contain robust, abstract category representations that

54 generalize across format. These results expand our previous understanding of motion-derived

55 animate and inanimate object category processing and provide useful tools for future research on

56 object category processing driven by multiple sources of visual information.

## 57 Introduction

58 Humans can categorize objects with striking speed and accuracy. Previous research on the  
59 neural basis of visual object recognition has largely focused on the processing of static features  
60 from images along the ventral visual hierarchy of the primate brain (reviewed in Peissig & Tarr,  
61 2007). However, real-world scenes are not static. In fact, decades of behavioral research have  
62 shown that motion cues can contain category-relevant information that humans use to make  
63 judgements about objects. Behavioral studies using point-light displays (PLDs, Johansson, 1973;  
64 Johansson, 1976) have established that, even with the impoverished motion information available  
65 in PLDs, humans can quickly perceive a moving person, identify the action being performed, and  
66 even determine the actor's age, gender, and affect (e.g., Barclay et al., 1978; Bassili, 1978; Cutting  
67 and Kozlowski, 1977; Dittrich et al., 1996).

68 The majority of biological motion research has focused on the perception of human motion  
69 due to the significant role that it plays in our social lives. However, our sensitivity to information  
70 in motion cues is not restricted to perceiving humans. Humans can also infer animacy and complex  
71 social relations from the movements of basic geometric shapes (Schultz & Bühlhoff, 2013; Heider  
72 & Simmel, 1944; Scholl & Gao, 2013) and can recognize animal categories such as chickens, dogs,  
73 horses and cats in PLDs (Mitkin & Pavlova, 1990; Mather & West, 1993; Pinto & Shiffrar, 2009;  
74 Pinto, 1994; Pavlova et al., 2001).

75 Investigations of the neural underpinnings of object categorization from motion  
76 information with neuroimaging have identified the superior temporal sulcus (STS) as a key region  
77 involved in processing biological motion. The STS has been shown to track animacy signals in  
78 motion cues from simple shapes and to process dynamic movements of human faces and bodies  
79 (Schultz & Bulthoff, 2013; Hirai & Hiraki, 2006; Pitcher et al. 2011, Pavlova et al., 2004).

80 Neuropsychological studies have also suggested the involvement of parietal regions in the  
81 integration of motion and form information during form-from-motion identification tasks (Schenk  
82 & Zihl, 1997).

83 Despite extensive research into neural substrates of human motion processing (Giese,  
84 2013), there have been comparatively few studies that have investigated how non-human motion  
85 is processed in the brain. Previous studies suggest preferential processing of human motion over  
86 that of one or two other classes, e.g., mammals or tools, in regions in lateral occipito-temporal  
87 cortex (LOTC) including the posterior STS (Papeo et al., 2017), human middle temporal complex  
88 (Kaiser et al., 2012), and fusiform gyrus (Grossman & Blake, 2002), as well as the inferior parietal  
89 lobe, inferior frontal gyrus (Saygin et al., 2004), the posterior and anterior cingulate cortices and  
90 the amygdala (Bonda et al., 1996; Ptito et al., 2003).

91 The limited neuroimaging studies that have directly compared object representations  
92 driven by motion to those driven by static images have focused on human (or monkey) faces and  
93 bodies (Furl et al., 2012; Hafri et al., 2017; Pitcher et al., 2011) or have only compared humans  
94 with tools (Beauchamp et al., 2003). Furthermore, these studies (with the exception of Beauchamp  
95 et al., 2003), have used videos containing both static and dynamic cues as their dynamic condition  
96 and thus have not been able to carefully separate the contributions of motion- and image-  
97 information to the responses. Thus, a systematic comparison of several object category  
98 representations driven by isolated motion and static cues has yet to be undertaken.

99 Here, we devised a novel method to generate stimuli that only contained motion cues. We  
100 extracted motion signals from videos of objects and simulated object movements using flow fields  
101 of moving dots. We first demonstrated that humans can recognize a wide variety of animate and  
102 inanimate objects in our dynamic stimuli. We then used these stimuli, along with static images, in

103 an fMRI study to compare object category representations derived from dynamic and static cues  
104 in occipito-temporal and parietal regions of interest across visual cortex.

## 105 Materials and Methods

### 106 **Stimuli**

#### 107 Stimulus creation pipeline

108 Eight categories were selected to sample a wide range of animate and inanimate object  
109 categories: human, non-human mammal, bird, reptile, vehicle, tool, pendulum/swing, and ball. We  
110 sought videos of objects performing a wide range of movements. Video clips were downloaded  
111 from various sources on the Internet or shot with in-house equipment in accordance with the  
112 following criteria: 1) contained a single moving object, 2) contained the entire object in frame  
113 without occlusion, 3) shot without camera movement (no zooming, panning, tracking), 4)  
114 contained no movement in the background, and 5) lasted at least 3 seconds.

115 We used in-house Matlab code, the Psychtoolbox extension, and in-house python code to  
116 generate moving dot patterns that followed the movement of the objects in the videos. To do this,  
117 first, all videos were trimmed to 3 seconds, cropped with a 3:2 x/y aspect ratio to center the object,  
118 and resized to 720 x 360 pixel resolution. Videos with 30 frames per second were then up-sampled  
119 so that all videos had a frame rate of 60 fps. The local, frame-by-frame motion of the objects in  
120 each video in x and y directions was then extracted using the Farneback optical flow algorithm  
121 (Farneback, 2003).

122 Next, object movements extracted from the full videos were projected on moving dot  
123 patterns. To create the moving dot stimuli, 2500 white dots (2 pixel diameter) were randomly  
124 initialized on a grey background (360 x 720 pixels). Dots that fell within pixels with nonzero  
125 motion vector values were moved in the direction and magnitude specified by the extracted motion

126 matrix in the next frame. The lifetime (number of contiguous frames of movement) of any dot was  
127 randomly sampled from a uniform distribution between 1 and 17 frames. The lifetime value  
128 decreased on every frame. If the lifetime of a dot reached 0 or they reached the boundaries of the  
129 frame, they were reinitialized with a lifetime of 17 frames.

130 The number of dots for a given frame and their lifetime was set to mitigate the formation  
131 of dot clusters that could induce perception of an edge in individual frames of the video. The  
132 frames were qualitatively examined to see if they induced a perception of any kind of edge or form.  
133 Videos that produced such artifacts were removed from the stimulus set. For the fMRI experiment,  
134 these moving dot videos were rendered live for each trial so that the dot initializations were always  
135 random.

136

### 137 *Stimulus Validation Experiment*

138 To ensure that the stimuli contained clear category information, we conducted an online  
139 experiment. 430 participants (223 women, aged 18-65) were recruited on Amazon Mechanical  
140 Turk to perform an object categorization task on the dynamic stimuli. Participants each performed  
141 between 10-11 trials. For each trial, participants were asked 3 questions about the object in a looped  
142 video: 1) whether the object in the video was of an animal or non-animal, 2) which of 8 listed  
143 categories the object belonged to, and 3) whether they could label the object. If subjects responded  
144 ‘yes’ for the third question, they were required to type the label in a response text box. Each of the  
145 three questions contained an “I don’t know” option. Subjects had to answer all three questions to  
146 complete each trial.

147 Overall, subjects categorized objects based on their motion in the moving dot stimuli with  
148 an average accuracy of 76% (202 total videos). The three animate (human, mammal, reptile) and

149 three inanimate (tool, ball, pendulum/swing) categories with the highest accuracy were used for  
150 the fMRI experiment. For each category, the 6 videos with the highest accuracy were selected  
151 (mean accuracy = 96%).

152 The overall ‘motion energy’ of each video was calculated by averaging the motion vectors  
153 across all pixels in all frames. Non-zero motion vectors were also used to calculate the average  
154 non-zero ‘motion energy’. The average overall and non-zero motion energy for the 6 videos in  
155 each category were entered into pairwise two-sample heteroscedastic t-test comparisons to ensure  
156 that there were no significant differences between categories for either metric. Neither the overall  
157 nor the non-zero motion energies were significantly different across categories (all  $ps > 0.05$ , even  
158 without correction for multiple comparisons).

159 After the dynamic video stimulus set was finalized, the static image stimulus set was  
160 generated by randomly selecting three frames of the full form video from which the moving dot  
161 stimulus was created. The frame with the object in clearest view was selected and further processed  
162 to extract the object from the frame. For the fMRI experiment, the isolated object was pasted onto  
163 a background of 2500 randomly initialized white dots on a grey background, to mimic a frame of  
164 the dynamic moving dot stimuli.

165

## 166 **Functional MRI experiment**

### 167 Participants

168 Fifteen healthy human subjects (six women, age range 19-42) with normal or corrected to  
169 normal vision were recruited for the fMRI experiment. Participants were brought in for a 2 h fMRI  
170 session that included the main experiment and three localizer tasks. Prior to entering the scanner,  
171 all participants practiced the tasks for the main experiment and localizer runs and underwent a



172 short behavioral task to familiarize themselves with the stimuli. All subjects provided informed  
173 consent and received compensation for their participation. The experiments were approved by the  
174 NIH ethics committee.

### 175 Training Session

176 The independent norming study performed with mTurk demonstrated that people can  
177 recognize the objects in these stimuli with high accuracy after minimal instruction. However, to  
178 avoid introducing any random factors across subjects and differential processing during the first  
179 run of the session relative to the rest, participants participated in a training session prior to entering  
180 the scanner. During the training session, they familiarized themselves with the 36 dynamic stimuli  
181 and were subsequently tested to ensure accurate recognition. Each video was shown on loop until  
182 subjects could verbally report which of the 6 categories the object belonged to. If the subject  
183 categorized the object correctly, the experimenter advanced to the next stimulus; incorrect  
184 categorizations were verbally corrected by the experimenter. After all stimuli had been verbally  
185 categorized, subjects underwent a testing session. In each trial, a random video was shown once  
186 without looping, followed by a grey screen with 6 category labels placed in a circle around the  
187 center of the screen. Subjects were instructed to categorize the object in the video by clicking on  
188 the corresponding category label. No feedback was provided during the testing session. If a subject  
189 performed above 90% accuracy, they continued on to the fMRI experiment. The training and  
190 testing session took no longer than 15 minutes. Subjects required little to no correction during the  
191 training session and performed with an average of 99% accuracy in the test session on the first  
192 iteration (n = 13, data for two subjects were lost due to technical problems).

193

194

195 *MRI Methods*

196 MRI data were collected from a Siemens MAGNETOM Prisma scanner at 3 Tesla  
197 equipped with a 32-channel head coil. Subjects viewed the display on a BOLDscreen 32 LCD  
198 (Cambridge Research Systems, 60 Hz refresh rate, 1600 x 900 resolution, at an estimated distance  
199 of 187 cm) through a mirror mounted on the head coil. The stimuli were presented using a Dell  
200 laptop with MATLAB and Psychtoolbox extensions (Brainard, 1997; Kleiner, Brainard, & Pelli,  
201 2007).

202 For each participant, a high resolution (1.0 x 1.0 x 1.0 mm) T1-weighted anatomical scan  
203 was obtained for surface reconstruction. All functional scans were collected with a T2\*-weighted  
204 single-shot, multiple gradient-echo EPI sequence (Kundu et al., 2012) with a multiband  
205 acceleration factor of 2 slices/pulse. 50 slices (3 mm thick, 3 x 3 mm<sup>2</sup> in-plane resolution) were  
206 collected to cover the whole brain (TR 2 s, TE = 12 ms, 28.28 ms, 44.56 ms, flip angle = 70°, FoV  
207 = 216 mm).

208 *Experimental Design*

209 **Main Experiment:** The main task of the experiment included 6 categories: human,  
210 mammal, reptile, tool, pendulum/swing, and ball and 2 stimulus conditions: dynamic (moving dot  
211 videos) and static (object images pasted on dot background). Both dynamic and static stimuli were  
212 presented at the same size and location (subtending 9.6° x 4.8° visual angle). We used a block  
213 design to present alternating blocks of dynamic and static stimuli while also alternating between  
214 animate and inanimate blocks. The order of the six categories and the two formats were  
215 counterbalanced within and across runs. Four different counterbalancing designs were created and  
216 each subject was randomly assigned one of the designs.

217 Each run contained 12 condition blocks, one for each condition (2 formats x 6 categories),  
218 began with an initial fixation block of 8 s, and ended with a final fixation of 12 s. Each condition  
219 block began with an 8 s fixation period in which a red fixation dot (5 pixels in radius) was shown  
220 on a grey background. The fixation period was then followed by the stimulus presentation period  
221 in which 4 stimuli were presented from the same condition, each for 2.8 s followed by a 200 ms  
222 inter-stimulus interval, resulting in 12 s of stimulus presentation. The duration of each condition  
223 block was 20 s (8 s fixation and 12 s stimulus presentation). For each run, the 12 condition blocks  
224 and the initial and final fixation blocks lasted 252 s (4 min 12 s). Each participant completed 12  
225 runs.

226 To maintain their attention, subjects were given a one-back repetition detection task in  
227 which they were instructed to press a button on an MRI-compatible button box (fORP, Cambridge  
228 Research Systems) to indicate detection of a repeated stimulus within each block. There was one  
229 stimulus repetition per block and the repeated stimulus of each block type was changed across  
230 runs. Because there were only 3 unique trials per block but each condition had 6 unique stimuli,  
231 half of the stimuli of each category were shown on odd runs and the other half were shown on the  
232 even runs. These blocks were later combined during analysis. Average performance on this task  
233 was 94%. To ensure proper fixation, eye movements were monitored using an ASL eye-tracker.

234 **Object Localizer task:** To localize functional ROIs in ventral and lateral occipito-temporal  
235 cortex, we presented images of objects in 6 conditions: faces, scenes, head-cropped bodies, central  
236 objects, peripheral objects (4 objects per image), and phase-scrambled objects in a block design  
237 paradigm. Subjects were instructed to fixate while 20 images were presented in each block for  
238 750ms with a 50ms fixation screen in between. Each block lasted 16 s and was repeated 4 times  
239 per condition. Each run started with a 12s fixation period. Additional 8 s fixation periods were

240 presented after every 5 blocks. Total run duration was 436 s (7 min 16 s). Subjects performed a  
241 motion detection task. During each block, a random image would jitter by rapidly shifting 4 pixels  
242 back and forth horizontally from the center of the screen. Subjects indicated detection of motion  
243 with a button press. Each participant completed 1-2 runs of this task.

244 **Motion localizer task:** To localize functional ROIs related to the perception of biological  
245 and non-biological motion, we presented blocks of point light display (PLD) videos of humans  
246 performing various actions in four conditions: 1) biological motion: normal PLD video (e.g.  
247 walking, riding a bicycle), 2) random motion: the points in the PLD were spatially scrambled in  
248 each frame, 3) translation: randomly positioned dots translated across the screen in a random  
249 direction with the speed set to the average speed of the movement from the PLD videos, and 4)  
250 static: a random frozen frame of the PLD was shown as an image. There were 8 exemplars per  
251 condition, each presented for 1.5 s followed by a 500 ms interstimulus fixation period. Each block  
252 lasted 16 s and was presented 4 times per condition. Each run began with a 6s fixation period and  
253 8 s fixation periods were interspersed between each block making the total run duration 422.7 s (7  
254 min 3 s). Subjects performed a one-back repetition detection task, in which they indicated detection  
255 of a repeated stimulus during each block by pressing a button. Each subject completed 1-2 runs of  
256 this task.

257 **Topographic mapping:** Topographic visual region V1 was mapped using 16 s blocks of  
258 a vertical or horizontal polar angle wedge with an arc of 60° flashing black and white  
259 checkerboards at 6 Hz. During the stimulus blocks, subjects fixated on a red fixation dot (5 pixel  
260 radius) and detected a dimming on the wedge, that occurred randomly either at the inner, middle,  
261 or outer ring of the wedge at 4 random times within the 16 s block. There was a 16 s fixation period

262 after each block and each run began with a 16 s period of fixation. Each run lasted 272 s (4 min  
263 and 40 s), and subjects completed 1-2 runs of this task.

#### 264 Data Analysis

265 fMRI data were analyzed using AFNI (Cox, 1996) and in-house MATLAB codes. The data  
266 were pre-processed by removing the first 2 TRs of each run, motion correction, slice timing  
267 correction, smoothing with 5mm FWHM, and intensity normalization. The EPI scans were  
268 registered to the anatomical volume. The three echoes were combined using a weighted average  
269 (Posse et al., 1999; Kundu et al., 2012). TRs with motion exceeding 0.3 mm as well as outliers  
270 were excluded from further analysis. A general linear model analysis with 12 factors (2 stimulus  
271 conditions x 6 categories) was used to extract t-values for each condition in each voxel. The 6  
272 degrees of freedom movement parameters was used as an external regressor. To account for the  
273 effect of residual autocorrelation on statistical estimates, we applied a generalized least squares  
274 time series fit with restricted maximum likelihood (REML) estimation of the temporal auto-  
275 correlation structure in each voxel. The t-values were calculated across all runs for the univariate  
276 analysis and per-run for the multivariate analysis.

#### 277 ROI Definition: Group-constrained subject specific method

278 We used a systematic, unbiased method for creating individualized regions of interest  
279 constrained by group responses to our localizer experiments, basing our approach on a method of  
280 region of interest definition developed by Kanwisher and Fedorenko (described in Pitcher et al.,  
281 2011).

282 First, t-values were extracted from generalized linear models (GLMs) of individual  
283 activation maps from the localizer experiments. All subjects' statistical activation maps (N = 15)

284 were converted to Talairach space. For each subject, the individual localizer contrast maps were  
285 thresholded at  $p < 0.0001$ . Group overlap proportion maps were then created for each contrast.

286       Second, we thresholded the group proportion maps for each contrast separately to  
287 counteract contrast- or localizer-specific differences in spatial variability or overall activation. The  
288 thresholds for specific contrast maps were as follows: For the object localizer experiment, the  
289 thresholds were  $N \geq 0.7$  for objects vs scrambled (lateral occipital, LO; posterior fusiform sulcus,  
290 pFS),  $N \geq 0.5$  for bodies vs objects (extrastriate body area, EBA), and  $N \geq 0.25$  for peripheral  
291 objects vs scrambled (inferior intraparietal sulcus, infIPS). For the biological motion experiment,  
292 the threshold for biological motion vs translation was  $N \geq 0.5$  (lateral occipito-temporal biomotion  
293 region, LOT-biomotion). For the retinotopy experiment, positive and negative maps were created  
294 separately and thresholded at  $N \geq 0.5$ .

295       Third, we used a Gaussian blur of 1mm FWHM. The blurred maps were then clustered  
296 using the nearest neighbors method and a minimum cluster size of 20 voxels. For V1, positive and  
297 negative maps were clustered separately and then combined with a step function. Two steps were  
298 required to finalize the group-constrained ROIs. Anatomical landmarks were used to separate pFS  
299 from LO, and LO from infIPS. V1 was separated from V2 using a hand-drawn region based on the  
300 group map. All ROIs were then selected to have no overlapping voxels.

301       The final nonoverlapping group-constrained ROIs were made subject specific by creating  
302 masks based on the individual subject's activity during the localizer experiments (localizer contrast  
303 threshold:  $p < 0.05$ ). For example, for each subject's EBA, the group-constrained EBA was masked  
304 by the subject's response to bodies > objects with a threshold of  $p < 0.05$ . If this process did not  
305 yield an ROI with at least 100 voxels across the two hemispheres, the ROI was instead created

306 with a mask made from the mean response during the main experiment (task vs fix,  $p < 0.0001$   
307 uncorrected).

308 The supramarginal (SMG) region of interest was anatomically defined using a Freesurfer  
309 parcellation (Desikan et al, 2006). To make the subject specific supramarginal ROIs, individual  
310 masks were made from the mean response during the main experiment (task vs fixation,  $p < 0.0001$   
311 uncorrected) and intersected with the template SMG region.

312

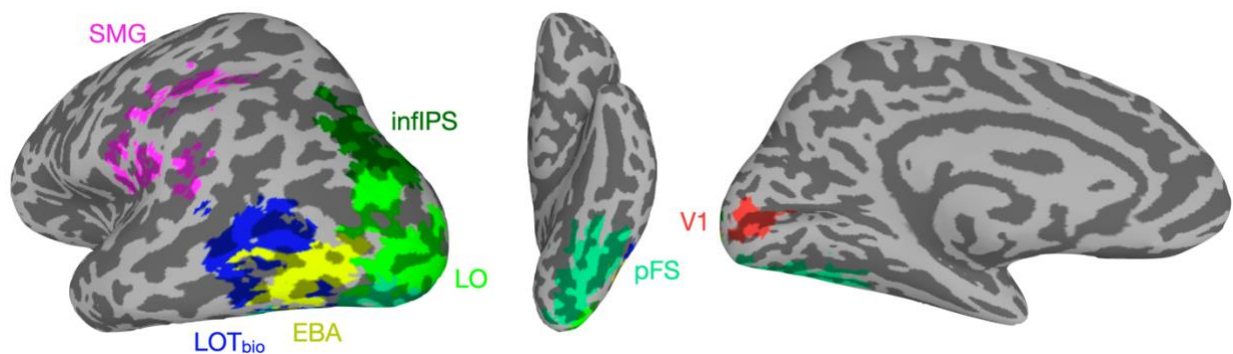

313 **Figure 1.** Regions of interest of a single example subject generated by the group-constrained single-subject  
314 method. The supramarginal area (SMG) is colored in pink, the inferior intraparietal sulcus (infIPS) is  
315 colored in dark green, the lateral occipital complex (LO) is colored in light green, the extrastriate body area  
316 (EBA) is colored in yellow, the biological motion related lateral occipito-temporal area (LOT-bio) is  
317 colored in dark blue, the posterior fusiform sulcus (pFS) is colored in teal, and primary visual cortex (V1)  
318 is colored in red.

319

### 320 Univariate analysis

321 To calculate the average fMRI response per condition for each ROI, using a general linear  
322 model analysis, whole brain t-value maps were extracted for each of the 12 conditions and masked  
323 with a task > fixation threshold of  $p < 0.0001$  for each subject. The group-constrained subject-  
324 specific ROIs were intersected with these maps, resulting in a t-value response per voxel in each  
325 ROI for all 12 conditions in each subject. The average responses for four conditions were then  
326 calculated from these ROI responses: dynamic animate, dynamic inanimate, static animate, and  
327 static inanimate. The animacy preference in each ROI was calculated as the difference between  
328 the animate and inanimate conditions, separately for the static and dynamic stimulus formats. One-

329 sample and paired t-tests were conducted to determine respectively: 1) if the animacy preference  
330 in each ROI and each format was significantly different from 0, and 2) if the animacy preference  
331 was significantly different across stimulus formats within each ROI. All t-tests were corrected for  
332 multiple comparisons with False Discovery Rate correction (Benjamini and Hochberg, 1995)  
333 across ROIs.

### 334 Multivariate pattern analysis (MVPA)

335 We performed multivariate pattern analyses to investigate whether object category  
336 information was present in the fMRI responses to the dynamic and static stimuli. We extracted t-  
337 values in each voxel for every condition in each run using a GLM analysis. To perform pairwise  
338 object category decoding, we used a linear support vector machine classifier (SVM; Chang and  
339 Lin, 2011) with feature selection. The SVM was trained using leave-one-out cross validation on  
340 data that was normalized with z-scoring to avoid magnitude differences between conditions. Using  
341 t-tests, we calculated the top 100 most informative voxels per ROI (Mitchell et al., 2004) to equate  
342 the number of voxels analyzed per ROI and facilitate comparisons between them. This feature  
343 selection was performed separately for each iteration of training. Results did not qualitatively  
344 change when the analysis was performed without feature selection.

345 We trained and tested the linear SVM in two conditions: 1) within-classification, in which  
346 the SVM was trained and tested on the same stimulus format, and 2) cross-classification, in which  
347 SVM was trained in one stimulus format and tested on the other format. The classification was  
348 performed on all unique pairs of object categories to obtain classification accuracy matrices. The  
349 off-diagonal values of the matrices were averaged to produce two within-format and two cross-  
350 format average object category decoding accuracies per subject. The two cross-format values were  
351 then averaged to obtain one cross-classification accuracy. One-sample and paired t-tests were



352 conducted to determine respectively: 1) if the decoding accuracy in each ROI and each format was  
353 significantly different from chance (0.5), and 2) if the decoding accuracy was significantly  
354 different across stimulus formats within each ROI. All p-values listed from t-tests and ANOVAs  
355 were corrected for multiple comparisons with False Discovery Rate correction across ROIs  
356 (Benjamini and Hochberg, 1995). For ANOVAs, effect sizes were calculated with generalized eta  
357 squared ( $\eta^2_G$ ), for the one sample and paired t-tests, Cohen's  $d$  was used.

### 358 Multidimensional scaling of fMRI responses

359 To visualize how stimulus format and object category impact the responses in our regions  
360 of interest, we quantified the similarities between the patterns of fMRI responses to the 12  
361 conditions in each ROI by calculating all pairwise Euclidean distances. The individual subject  
362 Euclidean distances per ROI were averaged across subjects to create group Euclidean distances,  
363 which will be referred to as the fMRI-Euclidean matrix. We then visualized these similarities by  
364 applying classical multidimensional scaling (Shepard, 1980) on the fMRI-Euclidean matrix and  
365 plotting the first two dimensions for each ROI.

366 We measured the reliability of the fMRI-Euclidean matrix by performing a permutation  
367 analysis wherein the individual subject matrices were split into two groups, averaged to create two  
368 group matrices, and then correlated to get a measure of the split-half reliability. Correlations for  
369 every possible combination of subjects in the two groups were measured and averaged to produce  
370 a final reliability score. The reliabilities of the dynamic and static fMRI-Euclidean matrices were  
371 evaluated separately.

372

373

374

## 375 **Object similarity behavioral experiment**

376           353 participants (32% female among the 85% who responded to the demographic survey)  
377 were recruited on Amazon Mechanical Turk to perform an object similarity task on the dynamic  
378 or static stimuli. All participants were located in the United States.

379           For each trial, participants were presented with three stimuli on a grey screen and were  
380 instructed to select the ‘odd-one-out’ stimulus (the stimulus that was most distinct among the three)  
381 by clicking on it. Dynamic and static stimuli were tested separately. Participants performed blocks  
382 of 15 trials to complete the task and were permitted to perform more than one block. To ensure  
383 data quality, trials with RTs smaller than 0.6 s and 1.2 s and larger than 10 s or 20 s were removed  
384 for the image and video tasks, respectively. These cutoffs were decided based on the distributions  
385 of RTs. If 5 or more trials in a block were eliminated, the entire block (or HIT in mTurk  
386 terminology) was removed. The eliminated blocks were resubmitted to mTurk to ensure that we  
387 had at least 2 repetitions for each unique triplet allowing for 68 trials for each pair of stimuli.

388           To build a dissimilarity matrix based on the odd-one-out image and video tasks, a response  
389 matrix of the pairwise dissimilarity judgments was constructed for each task by treating each triplet  
390 as three object pairs and assigning 1’s to dissimilar pairs (i.e. the two pairs that included the  
391 selected odd object) and a 0 to the similar pair (i.e. the pair that did not include the selected odd  
392 object). We also constructed a count matrix to determine how many times each pair was shown  
393 together in a triplet. By dividing the response matrix by the count matrix, we obtained a  
394 dissimilarity matrix with values ranging from 0-1 with higher values denoting higher dissimilarity.  
395 To produce a category level behavioral dissimilarity matrix, we took the off-diagonal upper  
396 triangle of the 36 x 36 matrix and averaged the item distances that belonged to the same category,  
397 resulting in a 6 x 6 matrix, which will be referred to as the behavioral-dissimilarity matrix. The

398 diagonal was nonzero due to nonzero distances between exemplars within each category. Only the  
399 off-diagonal of this matrix was used in further analyses.

400 To gauge the stability of the behavioral-dissimilarity matrix, we performed a split-half  
401 reliability analysis. Because each subject only saw a small set of all possible triplets, instead of  
402 splitting the data by subject, we split based on repeats of stimulus pairs (3 pairs per triplet) into  
403 two groups. The binary similarity values for all pairs were correlated across the two groups to  
404 produce a measure of reliability of the similarity judgments.

405

#### 406 *Multi-dimensional scaling and hierarchical clustering of object similarity responses*

407 We visualized the structure of the object similarity judgments from the odd-one-out tasks  
408 at the category level using classical multidimensional scaling on the behavioral-dissimilarity  
409 matrices of the dynamic and static stimuli separately (Shepard, 1980). The two behavioral-  
410 dissimilarity matrices were also correlated to quantify their degree of similarity. To investigate the  
411 structure of the object similarity judgments at the exemplar level, we used a hierarchical or  
412 agglomerative clustering algorithm available in the Python package *scipy* (Virtanen et al., 2020)  
413 on the dynamic and static behavioral-dissimilarity matrices separately. For visualization purposes,  
414 images of the individual exemplars, which were adapted from the static stimuli used in the  
415 experiment, were included under the resultant dendrograms for both static and dynamic conditions  
416 (note that dynamic stimuli are not recognizable in static frames).

417

#### 418 *Brain-behavior correlation*

419 To determine the relationship between the multivariate information for the six categories  
420 in each region of interest (fMRI-Euclidean matrix) with behavioral assessments of the category

421 similarity (behavioral-dissimilarity matrix), we correlated the two measures. For each subject, the  
422 off-diagonal of the fMRI-Euclidean matrix was correlated with the off-diagonal behavioral-  
423 dissimilarity matrix using Pearson's linear correlation coefficient, separately for the dynamic and  
424 static experiments. The correlations were then averaged across subjects. The noise ceiling of these  
425 correlations was then calculated for each ROI as the square root of the product of the reliabilities  
426 of the fMRI-Euclidean matrix and the behavioral-dissimilarity matrix. As the reliability of the  
427 behavioral-dissimilarity matrix was calculated with only one split, the standard error of the noise  
428 ceiling was calculated based on the mean and standard deviation of the reliability scores generated  
429 on each permutation of the fMRI-Euclidean reliability analysis.

430

#### 431 *Brain-optic flow correlation*

432 To ensure that optic flow information from the six object categories was not predictive of  
433 the multivariate fMRI responses in any of the regions of interest, we performed a control analysis.  
434 We first calculated the Euclidean distances between the dynamic stimulus information of each  
435 category by vectorizing the 4-dimensional stimuli (x-coordinates, y-coordinates, x- and y-  
436 magnitudes of optic flow, and time) and averaging the distances between stimuli of the same  
437 category, creating the optic flow-Euclidean matrix. We then correlated the optic flow-Euclidean  
438 matrix with the dynamic fMRI-Euclidean matrix of each ROI for each subject. The correlations  
439 were averaged across subjects to generate group mean correlations and one-sampled t-tests were  
440 used to determine whether any positive correlations were significantly above zero.

441

442

443

## 444 Results

### 445 Effect of stimulus format on univariate animacy preference

446 We first looked at the mean amplitude of responses to the two superordinate object  
447 categories (animate/inanimate) in the two stimulus formats (static/dynamic). We extracted  
448 individual subjects' t-values from the GLM analysis and averaged the response for the three  
449 animate and the three inanimate categories within each image format to get 4 values per subject.  
450 Figure 2 shows the pooled results of this analysis across subjects. A two-way ANOVA with  
451 stimulus format and animacy as factors showed a significant main effect of stimulus format in all  
452 ROIs ( $f_s > 7.26$ ,  $p_s \leq 0.02$ ,  $\eta_G^2s > 0.02$ ) with higher response amplitude in the dynamic compared  
453 to the static condition. A main effect of animacy was also found in LO, pFS, EBA, LOT-biomotion,  
454 and left SMG ( $f_s > 7.68$ ,  $p_s < 0.03$ ,  $\eta_G^2s > 0.02$ ), but not in V1, infIPS, or right SMG ( $f_s < 3.38$ ,  $p_s$   
455  $> 0.12$ ,  $\eta_G^2s < 0.009$ ). For the four ventrotemporal cortical areas, average responses were  
456 significantly higher for the animate object categories, while in left SMG the average response was  
457 higher for the inanimate object categories. The pattern of responses in SMG was not solely driven  
458 by the tool category as removing tools from the inanimate objects did not qualitatively change the  
459 results (data not shown).

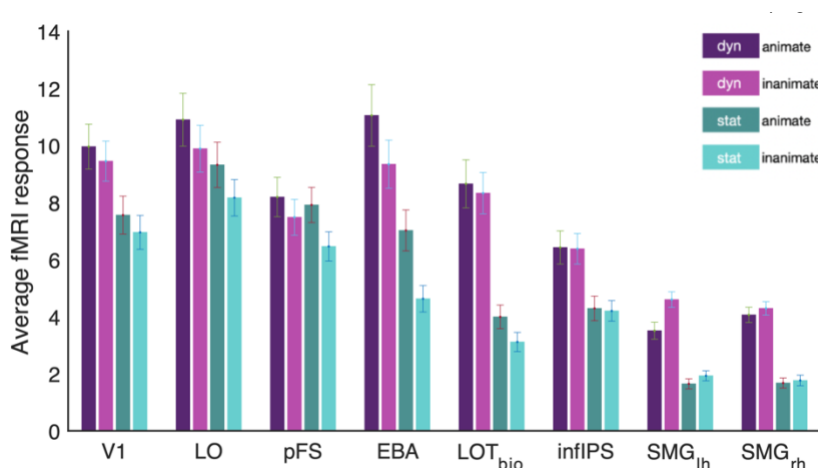

**Figure 2.** Univariate fMRI responses to dynamic and static stimuli averaged within animate and inanimate categories for each region of interest. Results do not qualitatively differ when removing the human and tool categories from the analysis. Error bars represent standard errors.

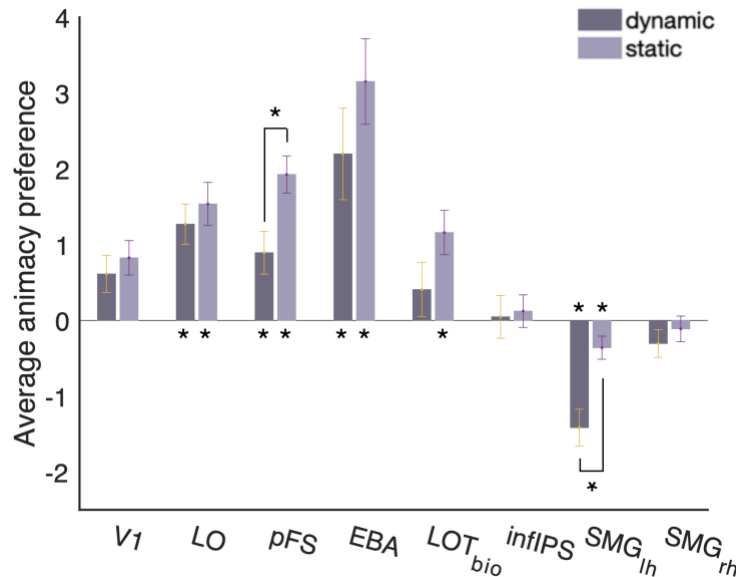

472 **Figure 3.** Univariate fMRI response preference for animate compared to inanimate object categories in  
473 dynamic and static stimuli for each region of interest. \* $p < 0.05$ . Error bars represent standard errors.  
474  
475

476 To better visualize and investigate the interaction between stimulus format and animacy,  
477 we subtracted inanimate responses from animate responses to produce a measure of animacy  
478 preference within each stimulus format (Figure 3). Unpaired t-tests evaluating animacy preference  
479 against 0 revealed that there was no animacy preference in V1, inferior IPS, and the right SMG  
480 area in either stimulus format (dynamic:  $t_s < 1.56$ ,  $p_s > 0.21$ , Cohen's  $d_s < 0.42$ , static:  $t_s < 0.76$ ,  
481  $p_s > 0.55$ , Cohen's  $d_s < 0.20$ ). In contrast, for both stimulus formats, LO, pFS, and EBA showed  
482 a preference for animate categories (dynamic:  $t_s > 3.15$ ,  $p_s < 0.02$ , Cohen's  $d_s > 0.84$ , static:  $t_s >$   
483  $5.05$ ,  $p_s < 0.0002$ , Cohen's  $d_s > 1.35$ ) while left SMG preferred inanimate categories (dynamic:  
484  $t(14) = 5.59$ ,  $p = 0.0005$ , Cohen's  $d = 1.49$ ). LOT-biomotion had significant preference for animate  
485 categories in the static ( $t(14) = 3.97$ ,  $p = 0.003$ , Cohen's  $d = 1.06$ ) but not in the dynamic condition  
486 ( $t(14) = 1.14$ ,  $p = 0.31$ , Cohen's  $d = 0.31$ ). All regions showed a preference in the same direction  
487 for dynamic and static conditions.

488 pFS and left SMG further showed a significant difference in the magnitude of their animacy  
489 preference across formats. pFS, a ventral region known to be involved in object recognition,

490 showed a stronger preference for animate object stimuli in the static compared to the dynamic  
491 condition (paired t-test:  $t(14) = 3.07, p = 0.03$ , Cohen's  $d = 0.79$ ), while left SMG, a parietal region  
492 thought to be involved in tool processing and action observation had a stronger preference for  
493 inanimate object stimuli in the dynamic compared to the static condition (paired t-test:  $t(14) =$   
494  $3.73, p = 0.02$ , Cohen's  $d = 0.96$ ). These significant interactions between stimulus format and  
495 animacy preference suggest that the category preference responses in pFS and left SMG are  
496 modulated by the format through which the category information is provided. The most ventral  
497 region, pFS, is more sensitive to static form presentations of animate objects and the most dorsal  
498 lateral region, left SMG, is more sensitive to dynamic motion information about inanimate objects.  
499

#### 500 **Effect of stimulus format on multivariate object category representations**

501 We next examined the multivariate patterns of each of our regions of interest to further  
502 explore how object category information is represented in the brain when sourced from dynamic  
503 movements and static images. We first sought to test if each of our regions contained information  
504 about the 6 object categories within each stimulus format. To do this, we calculated average  
505 pairwise classification accuracy for the 6 object categories for the static and dynamic conditions  
506 using a linear SVM classifier (Chang and Lin, 2011). Figure 4a shows the pooled results of this  
507 analysis across subjects. Unpaired t-tests revealed that the object categories were decoded  
508 significantly above chance in both dynamic and static formats in all regions but V1 (dynamic:  $ts >$   
509  $7.04, ps < 0.00001$ , Cohen's  $ds > 1.82$ ; static:  $ts > 2.73, ps < 0.02$ , Cohen's  $ds > 0.71$ ). In V1,  
510 significant decoding was only found in the static stimulus condition (static:  $t(14) = 8.31, p =$   
511  $0.00001$ , Cohen's  $d = 2.15$ ; dynamic:  $t(14) = 2.05, p = 0.06$ , Cohen's  $d = 0.53$ ). In all regions but  
512 infIPS, there were significant differences between the decoding accuracies across stimulus format

513 (infIPS:  $t(14) = 0.59$ ,  $p = 0.57$ , Cohen's  $d = 0.15$ ). In V1, LO, pFS, and EBA decoding accuracies  
514 were higher in the static condition than the dynamic ( $ts > 2.32$ ,  $ps < 0.001$ , Cohen's  $ds > 0.60$ ),  
515 while in LOT-biomotion and bilateral SMG, decoding accuracies were higher in the dynamic  
516 condition ( $ts > 3.24$ ,  $ps < 0.008$ , Cohen's  $ds > 0.84$ ).

517 To ensure that the significant decoding of object category from dynamic information was  
518 due to differences in the responses to object categories and not contingent upon optic flow  
519 information differences that were confounded with category in our stimulus set, we performed a  
520 control analysis in which we correlated the dynamic stimulus information with the multivariate  
521 fMRI responses (see Methods). No significant positive correlations were observed for any of the  
522 regions of interest ( $ts < 2.8$ ,  $ps > 0.06$ ).

523 We next used a cross-classification method to determine if abstract responses to object  
524 categories irrespective of stimulus format exist in our ROIs. The SVM classifier was trained in  
525 one stimulus format and then tested in the other format. Decoding accuracies when training on  
526 static and testing on dynamic and training on dynamic and testing on static were averaged to  
527 produce the light grey bars shown in Figure 4b. We also calculated the within-classification  
528 accuracy for training and testing within stimulus format (dark grey bars in Figure 4b; average of  
529 the two bars in Figure 4a). Significant cross-classification was observed in all regions of interest  
530 ( $ts > 5.31$ ,  $ps < 0.0001$ , Cohen's  $ds > 1.37$ ), and was significantly lower than within-classification  
531 in all ROIs ( $ts > 5.24$ ,  $ps < 0.0001$ , Cohen's  $ds > 1.35$ ). This suggests that the information about  
532 object categories in the multivariate pattern responses to the dynamic and static stimuli was  
533 sufficiently similar to allow for significant decoding in one stimulus format after being trained on  
534 the other.

535



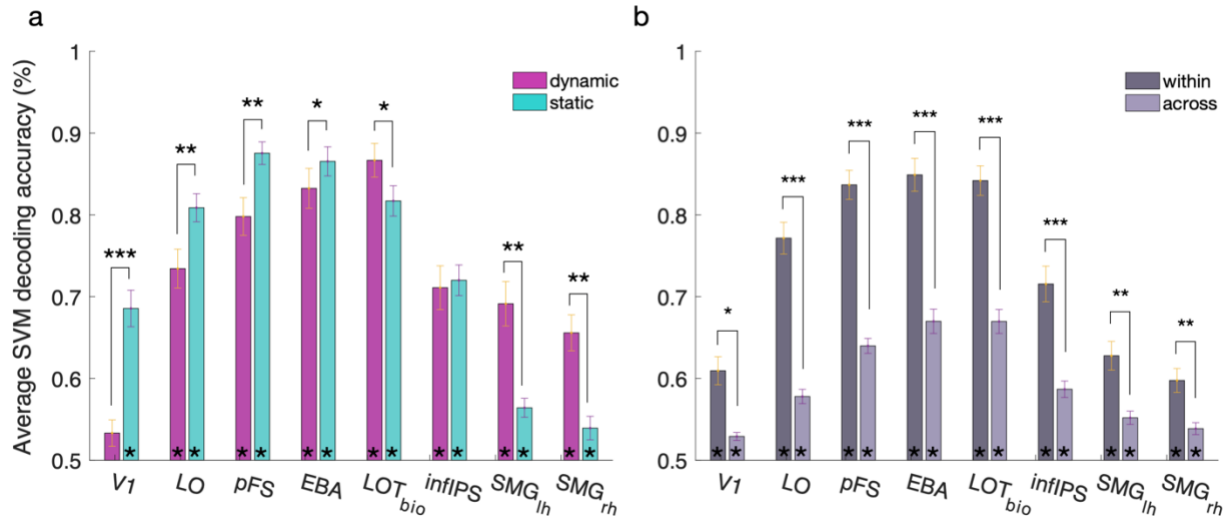

536 **Figure 4.** Object category SVM decoding accuracies in each ROI. a) Average SVM decoding accuracies  
 537 when training and testing within the dynamic (pink) and static (teal) conditions. Asterisks within the bars  
 538 represent significance in t-tests against chance. All average decoding accuracies were significantly above  
 539 chance except for the dynamic condition in V1. Asterisks above bars represent paired t-tests across  
 540 format. In all regions but infIPS, accuracies were significantly higher for one of the formats—LO, pFS,  
 541 and EBA had significantly higher accuracy in the static condition while LOT-biomotion and bilateral  
 542 SMG had significantly higher accuracy in the dynamic condition. b) The within stimulus format decoding  
 543 accuracies, depicted in dark grey bars, were produced by averaging the dynamic and static decoding  
 544 accuracies in A. The cross-format decoding accuracies are shown in light grey bars. Cross classification  
 545 was significantly above chance in all regions of interest. Within classification was significantly higher  
 546 than cross classification in all regions of interest. Error bars represent standard errors. Asterisk notation: \*  
 547  $p < 0.05$ , \*\*  $p < 0.001$ , \*\*\*  $p < 0.0001$ .  
 548

549 To further visualize the similarity between the fMRI responses to the object categories in  
 550 the dynamic and static conditions, we calculated the pairwise Euclidean distances between the  
 551 patterns of responses to the 6 object categories and the two stimulus formats in each ROI. We  
 552 then performed a multidimensional scaling analysis on the resultant dissimilarity matrix and  
 553 visualized the first two dimensions in each of the regions of interest (Figure 5). In all regions,  
 554 there was a clear separation between the responses to the dynamic (shown in purple and pink)  
 555 and static stimuli (shown in green and teal). In addition, the ventro-temporal regions and inferior  
 556 parietal cortex showed a separation amongst the individual object categories. The nearly parallel  
 557 lines connecting the dynamic and static conditions of the same category indicate that categories  
 558 with responses that were similar to each other in one condition were also similar to each other in

559 the other condition and is in line with the results of the cross-classification analysis performed  
560 earlier. In bilateral supramarginal areas, this object category separation was evident for the  
561 dynamic stimulus responses, but the static stimulus responses remained clustered together. In  
562 V1, while there was a separation between dynamic and static, the arrangement of categories does  
563 not appear to be consistent across conditions.

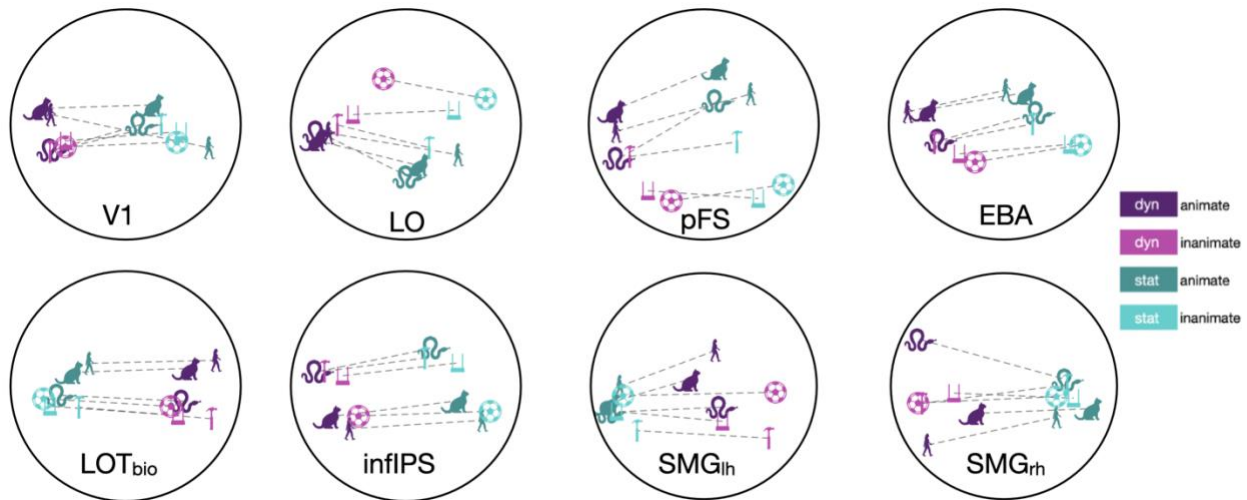

564 **Figure 5.** Multidimensional scaling visualization of fMRI response similarity between the object categories  
565 presented in the dynamic and static formats. MDS was performed on the similarity matrix obtained from  
566 the Euclidean distances of response patterns for the 12 conditions in each ROI. Dotted lines connect  
567 dynamic and static presentations of the same object category. The dynamic condition is signified by purple  
568 and the static condition is signified by green. Within each condition, the darker hues represent the animate  
569 categories while the lighter hues represent the inanimate categories. The 6 object categories are symbolized  
570 as with the following icons: human (person from side profile), mammal (cat), reptile (snake), tool (hammer  
571

### 572 **Odd-one-out behavioral experiment**

573 To investigate how the responses of each ROI to the 6 object categories in each format  
574 relates to the behavioral measure of similarity we performed two behavioral experiments on  
575 Amazon Mechanical Turk in which we showed participants three objects (either in static condition  
576 or in dynamic condition) and asked them to judge the similarity between the three objects and pick  
577 the odd-one-out. We calculated two dissimilarity matrices based on the responses, one for the static  
578 stimuli and one for the dynamic stimuli (see Methods). We then averaged the individual object

579 distances from each category to obtain dissimilarity scores between the 6 object categories for the  
580 two stimulus formats (Figure 6a). The reliability of these similarity judgments was evaluated for  
581 each stimulus format separately (see Methods). Participants rated both stimulus formats with  
582 highly stable similarity judgments ( $r = 0.98$  for both dynamic and static stimuli). We used  
583 multidimensional scaling on the pairwise dissimilarities of each stimulus format to visualize the  
584 distance between object categories in the first two dimensions (Figure 6b).

585 The dynamic and static similarity judgments had highly similar structure, showing a clear  
586 separation between animate and inanimate categories in the first dimension. The animate (human,  
587 mammal, and reptile) and inanimate (tool, pendulum/swing, and ball) categories were also  
588 separated from each other along the second dimension in both tasks. Overall, the dissimilarities  
589 from the dynamic and static tasks were highly correlated ( $r = 0.98$ ,  $p = 2.80e-10$ ), however, there  
590 also appeared to be slight qualitative differences in the arrangement of the inanimate object  
591 categories along the second dimension.

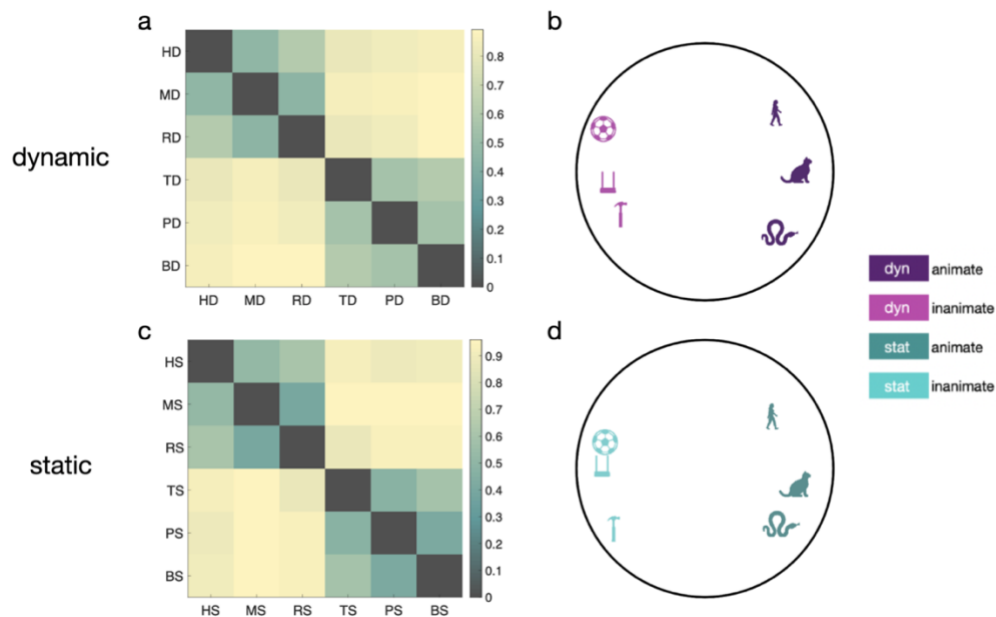

592 **Figure 6.** Odd-one-out similarity judgements of dynamic and static stimuli at the category level. The  
593 matrices depict pairwise dissimilarity scores between object categories in dynamic (a) and static (c)  
594 stimulus formats. The circle plots represent the object categories project into the first two dimensions from  
595 multidimensional scaling on their dissimilarities in the dynamic (b) and static (d) stimuli.

596           To further explore the similarity structure of the dynamic and static stimuli at the exemplar  
597 level, a hierarchical clustering algorithm was used on the odd-one-out similarity judgments (Figure  
598 7). Similar to the MDS of odd-one-out judgements at the category level, a gross distinction  
599 between animate and inanimate objects was observed for both the static and dynamic conditions.  
600 Moreover, as in the MDS, the three object categories within the animate and inanimate  
601 superordinate categories are largely distinguished in both formats. However, the clustering  
602 algorithm also revealed several interesting differences in the similarity judgments of the same  
603 objects when presented in either static image or dynamic optic flow format. For example, the  
604 dynamic baboon stimulus, a clip of a baboon sitting and feeding, was grouped with the human  
605 stimuli, while the static baboon stimulus was grouped with the mammal stimuli. Similarly, the  
606 dynamic presentation of the two pendulum stimuli were grouped with the swings, presumably due  
607 to their shared movement patterns, while their static presentations were grouped with the balls,  
608 likely due to their shared global form. These deviations of specific exemplars from their category  
609 clusters illustrate important differences in the category information provided by dynamic and static  
610 visual cues and shed light on some of the heuristics that are used to guide similarity judgments in  
611 the absence of either form or motion information. When luminance-defined edges are not  
612 available, robust category information can be derived from dynamic motion-isolated inputs.

613

614

615

616

617

618

619

620

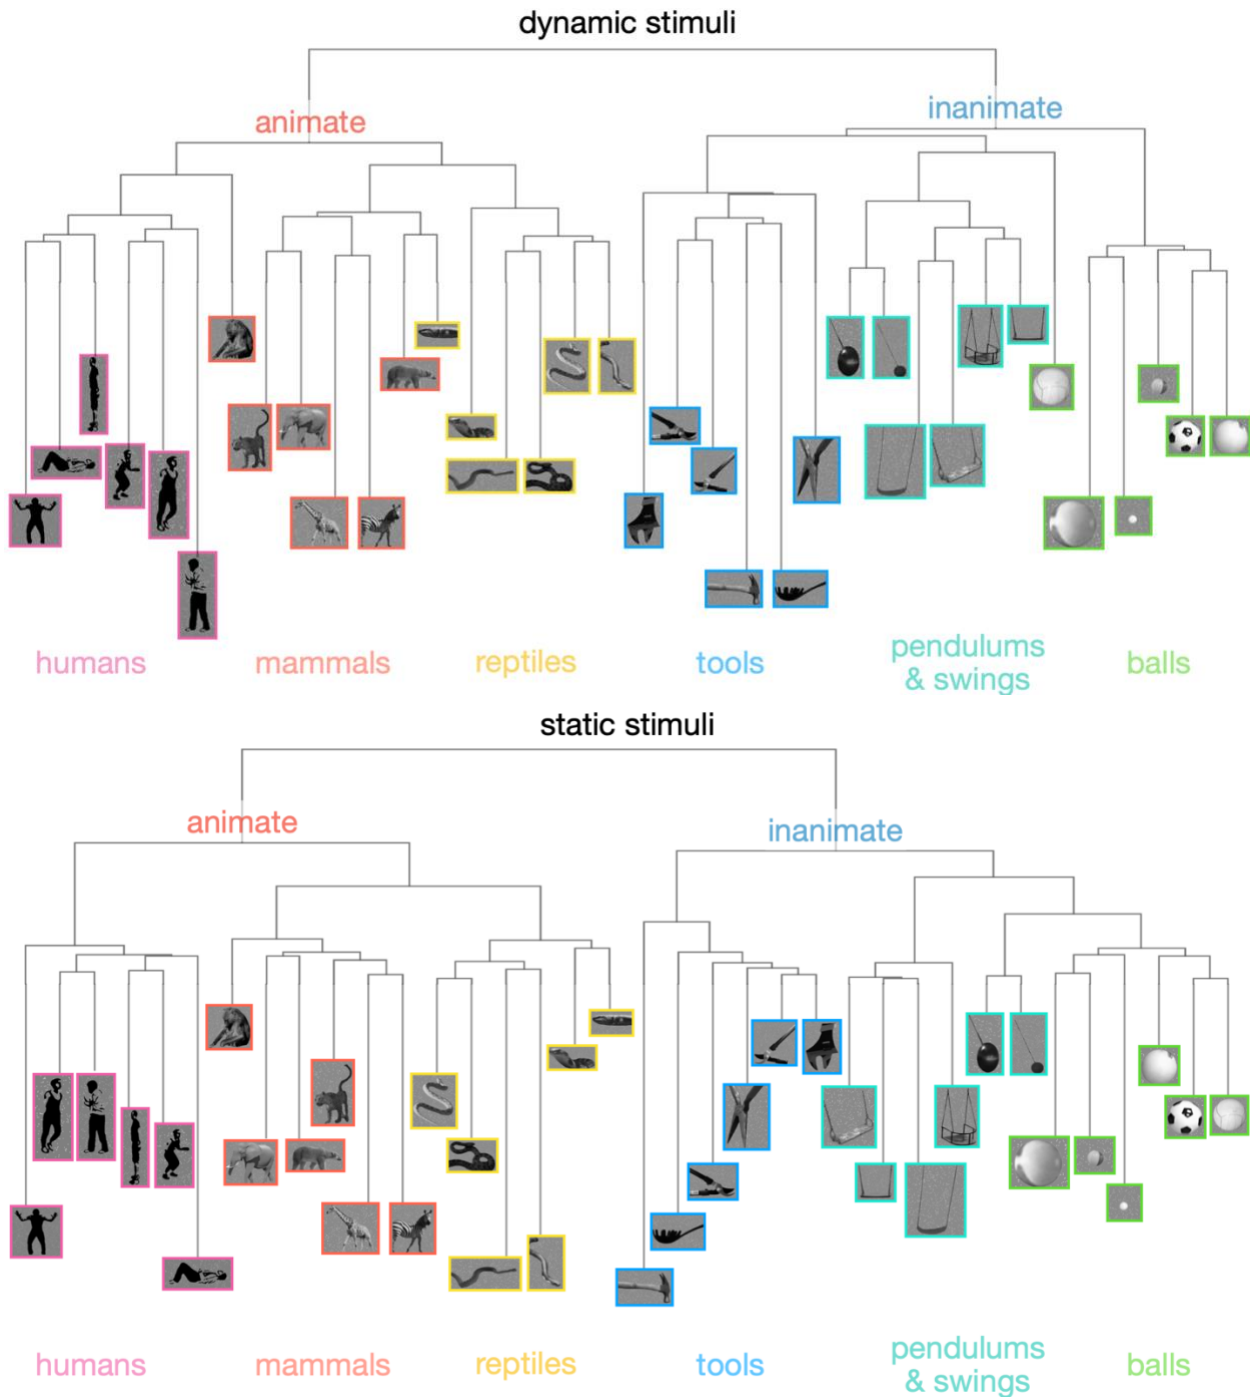

621

622

623

624

625

626

627

628

**Figure 7.** Hierarchical clustering of odd-one-out similarity judgments of the dynamic and static stimuli at the exemplar level. Edited versions of the static stimuli were used to visualize the similarity structure of both the dynamic (top) and static (bottom) stimuli as category of the dynamic stimuli cannot be gleaned from individual frames. The scale and position of the objects are not representative of the stimuli during presentation. Stimulus borders were colored to distinguish the six object categories. The human stimulus examples were modified into two-tone images for this figure to deidentify the individuals in the stimuli.

629 To investigate how the object category fMRI responses to each format relate to behavioral  
630 judgements of similarity, we correlated the dissimilarity scores from the dynamic and static  
631 behavioral experiments (dynamic and static reliability: 0.985) to those obtained from the Euclidean  
632 distances between the multivariate response patterns in each region of interest ( $r$ s: dynamic > 0.03;  
633 static > 0.02, apart from right SMG, see below). As shown in Figure 8, most ventral and lateral  
634 temporal regions—LO, pFS, EBA, LOT-biomotion—showed significant correlations with the  
635 object similarity judgments for both the dynamic and static stimuli (dynamic:  $p$ s < 0.01; static:  $p$ s  
636 < 0.05). The responses in infIPS were not correlated to object similarity judgments for either the  
637 dynamic or static stimuli (dynamic:  $p$  = 0.12, static:  $p$  = 0.59). The activity in left SMG was  
638 significantly correlated with the similarity judgments for the dynamic stimuli ( $p$  = 0.001), but not  
639 for the static stimuli ( $p$  = 0.59). Similarly, the activity in V1 was significantly correlated with  
640 similarity judgments for the static stimuli ( $p$  = 0.02), but not for the dynamic stimuli ( $p$  = 0.14).  
641 The only significant difference between the correlations of the behavioral similarity judgments and  
642 the fMRI responses to the two conditions was found in the left SMG area, in which the correlation  
643 was significantly higher with similarity judgments of the dynamic stimuli compared to the static  
644 stimuli ( $t(14) = 3.32$ ,  $p = 0.04$ , Cohen's  $d = 0.86$ ). In the right SMG area, the  $r$  value was -0.0083  
645 for the static condition, signifying a reliability of zero. As this suggests that the responses to the  
646 static stimuli in this region were unreliable, the correlation between the multivariate fMRI  
647 responses in the right SMG to the static stimuli with behavioral assessments of their similarity will  
648 not be interpreted.

649

650

651

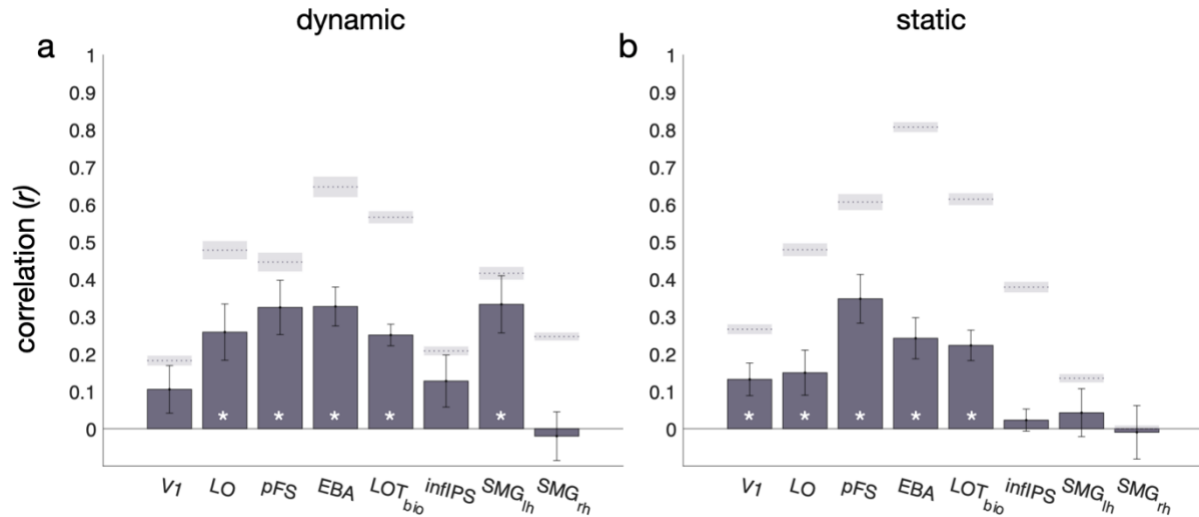

652 **Figure 8.** Correlation of Euclidean distance between multivariate fMRI responses and behavioral  
653 dissimilarity matrices for a) dynamic and b) static stimuli. \*  $p < 0.05$ . Error bars represent standard errors.  
654 Shaded regions represent the average noise ceiling (dotted line) and the standard error of noise (shaded  
655 region) for each ROI.

656

## 657 Discussion

658 Motion is an important visual cue that can provide category-relevant information in the  
659 absence of luminance-defined edges and form. Here, we introduce a novel approach to  
660 systematically separate form and motion signals and study the contribution of the motion signal to  
661 object category processing in isolation. To our knowledge, our study is the first to use this approach  
662 to compare the neural processing of form and motion signals from several animate and inanimate  
663 object categories. We sought to determine whether category-relevant information from the two  
664 sources is shared across the visual system by comparing dynamic and static category processing  
665 in regions of interest across visual occipito-temporal and parietal cortices. The two highly  
666 dissimilar information sources produced distinct but overlapping representations of animate and  
667 inanimate object categories, with a shift in processing primarily static information in more ventral  
668 regions to primarily dynamic information in more dorsal regions of cortex.

669

## 670 **Categorizing Objects with Motion Information**

671 An object identification task was used to determine whether our method for simulating the  
672 extracted motion information in dynamic flow fields could produce stimuli in which objects were  
673 recognizable. Our findings illustrate that, not only do people categorize motion-defined *animate*  
674 objects with high accuracy (Pinto, 2006; Pinto, 1994; Pavlova et al., 2001), this high performance  
675 also holds for three *inanimate* object categories: tools, swinging objects, and balls. These results  
676 extend previous research by showing that a wide range of objects spanning animate and inanimate  
677 categories can be recognized from just motion information. Our odd-one-out judgment task further  
678 demonstrated that the similarity judgments for the dynamic and static stimuli were highly  
679 correlated. This consistency suggests that people infer the similarity of objects from the two  
680 sources of information in a similar way.

681 When discussing the perception of objects from motion, it is important to distinguish  
682 between two types of information that can be gleaned from motion cues: 1) structure from motion,  
683 a percept of a form arising from the global integration of coherent local motion vectors, and 2)  
684 types of actions that are diagnostic of a particular object category such as walking, swinging, tool  
685 use, bouncing, etc. Though it was not within the scope of this study to systematically distinguish  
686 these two sources, the exemplar level clustering of our odd-one-out data qualitatively suggests that  
687 both factors may play an important role in subjects' judgements of object similarity. For example,  
688 images of pendulums and bouncing balls maybe judged to be similar since they both contain a  
689 round shape, but distinct in dynamic form because they move differently.

690

691

692



## 693 **Format-dependent processing of object categories**

694           Comparison of the object category information across the two stimulus formats revealed  
695 differences in many of our regions of interest. Our findings suggest that stimulus format matters  
696 for: 1) processing of animate and inanimate objects—indicated by the regions of interest with  
697 significant interactions between stimulus format and univariate animacy preference (i.e., pFS and  
698 left SMG)—and 2) discriminating object categories within format—indicated by regions with  
699 significant differences in the multivariate classification accuracy of the responses to dynamic and  
700 static stimuli (i.e., all regions but infIPS). Broadly speaking, we found that the most ventral and  
701 posterior regions we examined (LO, EBA, and pFS) showed higher classification in the static  
702 condition, while most dorsal and anterior regions (LOT-biomotion and bilateral SMG) had  
703 stronger classification in the dynamic condition. Interestingly, infIPS used both sources of  
704 information without dominance of one source over the other. Importantly, all regions of interest  
705 but V1 showed robust responses to, and significant decoding accuracies of, all categories presented  
706 in both static image and dynamic motion formats. Thus, differential multivariate processing of  
707 object category based on stimulus format in these regions is a matter of degree. These results align  
708 with predictions from the model presented by Giese and Poggio (2003), in which form and motion  
709 signals are processed by distinct neural populations that largely overlap in topographic regions  
710 across ventral and dorsal cortex.

711

## 712 **Animate and Inanimate Category Processing**

713           Relative to static images, investigation of topographic organization of object category  
714 processing driven by motion information has been largely neglected. However, an important  
715 exception can be found in the work of Beauchamp and colleagues (2003), in which they compared

716 univariate fMRI responses between 1) full form videos and static images of humans and tools and  
717 2) full form videos and point-light displays of humans and tools. Beauchamp et al. (2003) argued  
718 for two processing pathways—form and motion. Lateral temporal regions (STS and MTG),  
719 respond to their preferred category, humans and tools, respectively, in both PLDs and videos,  
720 suggesting category preference from motion without requiring form. Meanwhile, ventral temporal  
721 cortex (lateral and medial fusiform), needed form information for category preference responses.  
722 Our results are in agreement with these findings and demonstrate that the topography of animacy  
723 preference is not dependent on or exclusive to the human and tool categories—it also expands to  
724 other animate objects such as mammals and reptiles, and other inanimate objects such as  
725 pendulums/swings, and balls. These results suggest that large-scale animacy preference maps  
726 (Konkle & Caramazza, 2013, Sha et al., 2015) found with static objects in the brain might also be  
727 present for motion defined stimuli. Future studies with a larger stimulus set and sufficient power  
728 to perform whole-brain analyses will be crucial for expanding our findings beyond functionally  
729 defined regions of interest in VOTC and parietal cortex.

730

### 731 **Distinct but Overlapping Representations of Object Category for Dynamic and Static**

#### 732 **Stimuli**

733 Using linear SVM classifiers, we decoded object category with high accuracy in all regions  
734 tested. In all regions but V1 and the right supramarginal area, both information sources drove  
735 object representations that were sufficiently distinguishable from each other to allow for high  
736 classification performance. Extracting form and motion information from the same objects and  
737 presenting them separately also allowed us to investigate the extent to which the representations  
738 are overlapping across stimulus formats. We used a cross-classification approach to identify

739 regions that have format independent responses. A similar analysis has been used previously to  
740 study fMRI responses to human actions in full form videos and images (Hafri et al., 2017). Our  
741 results are largely in qualitative agreement with those of Hafri and colleagues, with the exception  
742 that we found significantly more widespread cross-classification, possibly because our static  
743 stimuli were source matched to our dynamic stimuli. Cross-decoding in all regions (apart from V1)  
744 suggests that the object category representations driven by static and dynamic information were  
745 sufficiently distinct to allow for significant within format classification, but also sufficiently  
746 overlapping that their shared information could lead to significant cross-classification. These  
747 results suggest the existence of abstract object category responses that pool information about  
748 object category across various cues in the visual input.

749

#### 750 **Relationship between brain and behavior**

751       Multivariate responses to both the dynamic and static conditions in LO, pFS, EBA, and  
752 LOT-biomotion—the ventral and lateral regions—were correlated with the object similarity  
753 judgments of the dynamic and static stimuli, respectively, with no differences across condition.  
754 This implies that the fMRI responses in these regions follow the structure of the stimulus similarity  
755 characterized by our odd-one-out experiment. The only region to show a difference in correlation  
756 across the stimulus conditions was the left supramarginal area, which showed higher correlations  
757 for the fMRI responses to the dynamic relative to the static stimuli. By contrast, the right  
758 supramarginal area showed no significant correlation to behavioral judgments of either condition,  
759 which indicates a lateralization of inanimate category processing to the left supramarginal area.  
760 This left lateralization has been shown previously in research on tool processing (Beauchamp et  
761 al., 2003). Importantly, not all regions that showed significant animacy preference or object

762 category decoding had responses that were significantly correlated with the similarity structure of  
763 the behavioral judgments. In V1 and infIPS, the fMRI responses to both conditions were unrelated  
764 to the similarity judgments of both stimulus types, suggesting that these regions were extracting  
765 features irrelevant to similarity judgments on the objects.

766

## 767 **Conclusion**

768 In sum, our study demonstrates that in regions across occipito-temporal and parietal  
769 cortices, category responses driven by isolated motion signals parallel category responses to static  
770 form signals in a number of interesting ways. Regions that are traditionally considered part of the  
771 visual object recognition pathway that processes static information, such as the pFS, LO, and EBA,  
772 also extract robust object category information from isolated motion signals relevant to behavioral  
773 judgments of object similarity. Furthermore, cross-classification of object categories in all regions  
774 suggests that object-category information from static and dynamic signals overlap. Lastly,  
775 preferential processing of certain kinds of objects, such as animate or inanimate objects, is  
776 sensitive in some regions, i.e., the pFS and left SMG, to the format of visual information. Using  
777 the stimulus generation approach we have introduced, future studies can expand beyond the six  
778 object categories tested here and introduce parametric manipulations of dimensions that are likely  
779 to play an important role in differential processing of motion-derived object categories. Candidate  
780 dimensions include the type of action or movements that the objects are performing as well as the  
781 orientation from which the movements are viewed. Such studies will be important for furthering  
782 our understanding of how various visual cues to object-category are processed and integrated  
783 together to form rich and robust object representations in the human brain.

784 **References**

- 785 1. Barclay, C. D., Cutting, J. E., & Kozlowski, L. T. (1978). Temporal and spatial factors in gait  
786 perception that influence gender recognition. *Perception & psychophysics*, 23(2), 145-152.
- 787 2. Bassili, J. N. (1978). Facial motion in the perception of faces and of emotional expression. *Journal*  
788 *of experimental psychology: human perception and performance*, 4(3), 373.
- 789 3. Beauchamp, M. S., Lee, K. E., Haxby, J. V., & Martin, A. (2003). fMRI responses to video and  
790 point-light displays of moving humans and manipulable objects. *Journal of cognitive neuroscience*,  
791 15(7), 991-1001.
- 792 4. Benjamini, Y., & Hochberg, Y. (1995). Controlling the false discovery rate: a practical and  
793 powerful approach to multiple testing. *Journal of the Royal statistical society: series B*  
794 *(Methodological)*, 57(1), 289-300.
- 795 5. Bonda, E., Petrides, M., Ostry, D., & Evans, A. (1996). Specific involvement of human parietal  
796 systems and the amygdala in the perception of biological motion. *Journal of Neuroscience*, 16(11),  
797 3737-3744.
- 798 6. Brainard, D. H. (1997) The psychophysics toolbox. *Spatial Vision*. 10:433–436.
- 799 7. Chang, C. C., & Lin, C. J. (2011). LIBSVM: a library for support vector machines. *ACM*  
800 *transactions on intelligent systems and technology (TIST)*, 2(3), 1-27.
- 801 8. Cox, R. W. (1996). AFNI: software for analysis and visualization of functional magnetic resonance  
802 neuroimages. *Computers and Biomedical Research*, 29(3):162-173. doi:10.1006/cbmr.1996.0014
- 803 9. Cutting, J. E., Kozlowski, L. (1977) “Recognition of friends by their walk.” *Bulletin of the*  
804 *Psychonomic Society*, 9, 353–356.
- 805 10. Desikan, R. S., Ségonne, F., Fischl, B., Quinn, B. T., Dickerson, B. C., Blacker, D., Buckner, R.L.,  
806 ... & Killiany, R. J. (2006). An automated labeling system for subdividing the human cerebral  
807 cortex on MRI scans into gyral based regions of interest. *Neuroimage*, 31(3), 968-980.
- 808 11. Dittrich, W. H., Troscianko, T., Lea, S. E., & Morgan, D. (1996). Perception of emotion from  
809 dynamic point-light displays represented in dance. *Perception*, 25(6), 727-738.

- 810 12. Farneback, G. (2003, June). Two-frame motion estimation based on polynomial expansion. In  
811 Scandinavian conference on Image analysis (pp. 363-370). Springer, Berlin, Heidelberg.
- 812 13. Furl, N., Hadj-Bouziane, F., Liu, N., Averbek, B. B., & Ungerleider, L. G. (2012). Dynamic and  
813 static facial expressions decoded from motion-sensitive areas in the macaque monkey. *Journal of*  
814 *Neuroscience*, 32(45), 15952-15962.
- 815 14. Giese, M. A., & Poggio, T. (2003). Neural mechanisms for the recognition of biological  
816 movements. *Nature Reviews Neuroscience*, 4(3), 179-192.
- 817 15. Giese, M. A. (2013). Biological and body motion perception. *The Oxford handbook of perceptual*  
818 *organization*, 575-596.
- 819 16. Grossman, E. D., & Blake, R. (2002). Brain areas active during visual perception of biological  
820 motion. *Neuron*, 35(6), 1167-1175.
- 821 17. Hafri, A., Trueswell, J., & Epstein, R. (2017) Neural Representations of Observed Actions  
822 Generalize across Static and Dynamic Visual Input. *Journal of Neuroscience* 37(11): 3056-3071.
- 823 18. Hirai, M., & Hiraki, K. (2006). The relative importance of spatial versus temporal structure in the  
824 perception of biological motion: an event-related potential study. *Cognition*, 99(1), B15-B29.
- 825 19. Ishai, A., Ungerleider, L. G., Martin, A., Schouten, J. L., & Haxby, J. V. (1999). Distributed  
826 representation of objects in the human ventral visual pathway. *Proceedings of the National*  
827 *Academy of Sciences*, 96(16), 9379-9384.
- 828 20. Johansson, G. (1976). Spatio-temporal differentiation and integration in visual motion perception.  
829 *Psychological research*, 38(4), 379-393.
- 830 21. Johansson, G. (1973) "Visual perception of biological motion and a model of its analysis"  
831 *Perception & Psychophysics*, 14, 201-211.
- 832 22. Kaiser, M. D., Shiffrar, M., & Pelphrey, K. A. (2012). Socially tuned: Brain responses  
833 differentiating human and animal motion. *Social neuroscience*, 7(3), 301-310.
- 834 23. Kleiner, M., Brainard, D., Pelli, D. (2007) "What's new in Psychtoolbox-3?" *Perception*, 36, ECVF  
835 Abstract Supplement.

- 836 24. Konkle, T., & Caramazza, A. (2013). Tripartite organization of the ventral stream by animacy and  
837 object size. *Journal of Neuroscience*, 33(25), 10235-10242.
- 838 25. Kundu, P., Inati, S.J., Evans, J.W., Luh, W.M. & Bandettini, P.A. (2012). Differentiating BOLD  
839 and non-BOLD signals in fMRI time series using multi-echo EPI. *NeuroImage*, 60, 1759-1770.
- 840 26. Mitchell TM, Hutchinson R, Niculescu RS, Pereira F, Wang XR, Just M, Newman S (2004)  
841 Learning to decode cognitive states from brain images. *Machine Learning* 57:145–175.
- 842 27. Mather, G., & West, S. (1993). Recognition of animal locomotion from dynamic point-light  
843 displays. *Perception*, 22(7), 759-766.
- 844 28. Papeo, L., Wurm, M. F., Oosterhof, N. N., & Caramazza, A. (2017). The neural representation of  
845 human versus nonhuman bipeds and quadrupeds. *Scientific reports*, 7(1), 1-8.
- 846 29. Pavlova, M., Krägeloh-Mann, I., Sokolov, A., & Birbaumer, N. (2001). Recognition of point-light  
847 biological motion displays by young children. *Perception*, 30(8), 925-933.
- 848 30. Pavlova, M., Lutzenberger, W., Sokolov, A., & Birbaumer, N. (2004). Dissociable cortical  
849 processing of recognizable and non-recognizable biological movement: analysing gamma MEG  
850 activity. *Cerebral Cortex*, 14(2), 181-188.
- 851 31. Peissig, J. J., & Tarr, M. J. (2007). Visual object recognition: Do we know more now than we did  
852 20 years ago? *Annual Review of Psychology*, 58, 75-96.
- 853 32. Pinto, J. (1994). Human infants' sensitivity to biological motion in pointlight cats. *Infant Behavior*  
854 *and Development*, 17, 871.
- 855 33. Pinto, J. (2006). "Developing body representations: A review of infants' responses to biological-  
856 motion displays". In *Perception of the human body from the inside out*, Edited by: Knoblich, G.,  
857 Grosjean, M., Thornton, I. and Shiffrar, M. 305–322.
- 858 34. Pinto, J., & Shiffrar, M. (2009). The visual perception of human and animal motion in point-light  
859 displays. *Social Neuroscience*, 4(4), 332-346.

- 860 35. Pitcher, D., Dilks, D. D., Saxe, R. R., Triantafyllou, C., & Kanwisher, N. (2011). Differential  
861 selectivity for dynamic versus static information in face-selective cortical  
862 regions. *Neuroimage*, *56*(4), 2356-2363.
- 863 36. Posse, S., Wiese, S., Gembris, D., Mathiak, K., Kessler, C., Grosse-Ruyken, M. L., Elghahwagi,  
864 B., ... & Kiselev, V. G. (1999). Enhancement of BOLD-contrast sensitivity by single-shot multi-  
865 echo functional MR imaging. *Magnetic Resonance in Medicine: An Official Journal of the*  
866 *International Society for Magnetic Resonance in Medicine*, *42*(1), 87-97.
- 867 37. Ptito, M., Faubert, J., Gjedde, A., & Kupers, R. (2003). Separate neural pathways for contour and  
868 biological-motion cues in motion-defined animal shapes. *Neuroimage*, *19*(2), 246-252.
- 869 38. Saygin, A. P., Wilson, S. M., Hagler, D. J., Bates, E., & Sereno, M. I. (2004). Point-light biological  
870 motion perception activates human premotor cortex. *Journal of Neuroscience*, *24*(27), 6181-6188.
- 871 39. Schenk, T., & Zihl, J. (1997). Visual motion perception after brain damage: II. Deficits in form-  
872 from-motion perception. *Neuropsychologia*, *35*(9), 1299-1310.
- 873 40. Scholl, B. J., & Gao, T. (2013). Perceiving animacy and intentionality: Visual processing or higher-  
874 level judgment. *Social perception: Detection and interpretation of animacy, agency, and intention*,  
875 *4629*, 197-229.
- 876 41. Schultz, J., & Bühlhoff, H. H. (2013). Parametric animacy percept evoked by a single moving dot  
877 mimicking natural stimuli. *Journal of vision*, *13*(4), 15-15.
- 878 42. Sha, L., Haxby, J. V., Abdi, H., Guntupalli, J. S., Oosterhof, N. N., Halchenko, Y. O., & Connolly,  
879 A. C. (2015). The animacy continuum in the human ventral vision pathway. *Journal of cognitive*  
880 *neuroscience*, *27*(4), 665-678.
- 881 43. Shepard, R. N. (1980) Multidimensional scaling, tree-fitting, and clustering. *Science* *210*:390–398.
- 882 44. Virtanen, P., Gommers, R., Oliphant, T. E., Haberland, M., Reddy, T., Cournapeau, D., ... & Van  
883 Mulbregt, P. (2020). SciPy 1.0: fundamental algorithms for scientific computing in Python. *Nature*  
884 *methods*, *17*(3), 261-272.
